# Supplementary material
Source: PubMed Central journal article supplement (PMC6917900)
Supplement: NIHMS1049776-supplement-1.pdf [file NIHMS1049776-supplement-1.pdf]

# Supplemental Figure 1

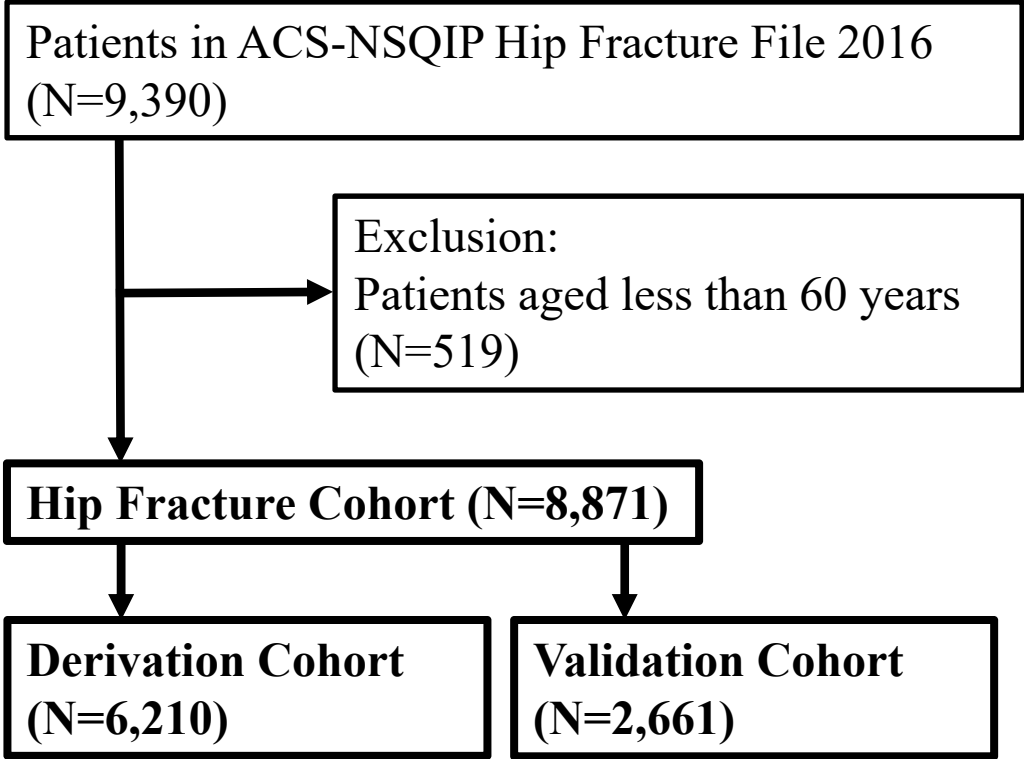

**Supplemental Figure 1.** Selection of hip fracture patients, American College of Surgeons National Surgical Quality Improvement Program (ACS-NSQIP) Hip Fracture Targeted Participant Use Data File, 2016.
