# Supplementary material
Source: PubMed Central journal article supplement (PMC6917900)
Supplement: NIHMS1049776-supplement-2.pdf [file NIHMS1049776-supplement-2.pdf]

# Supplemental Figure 2

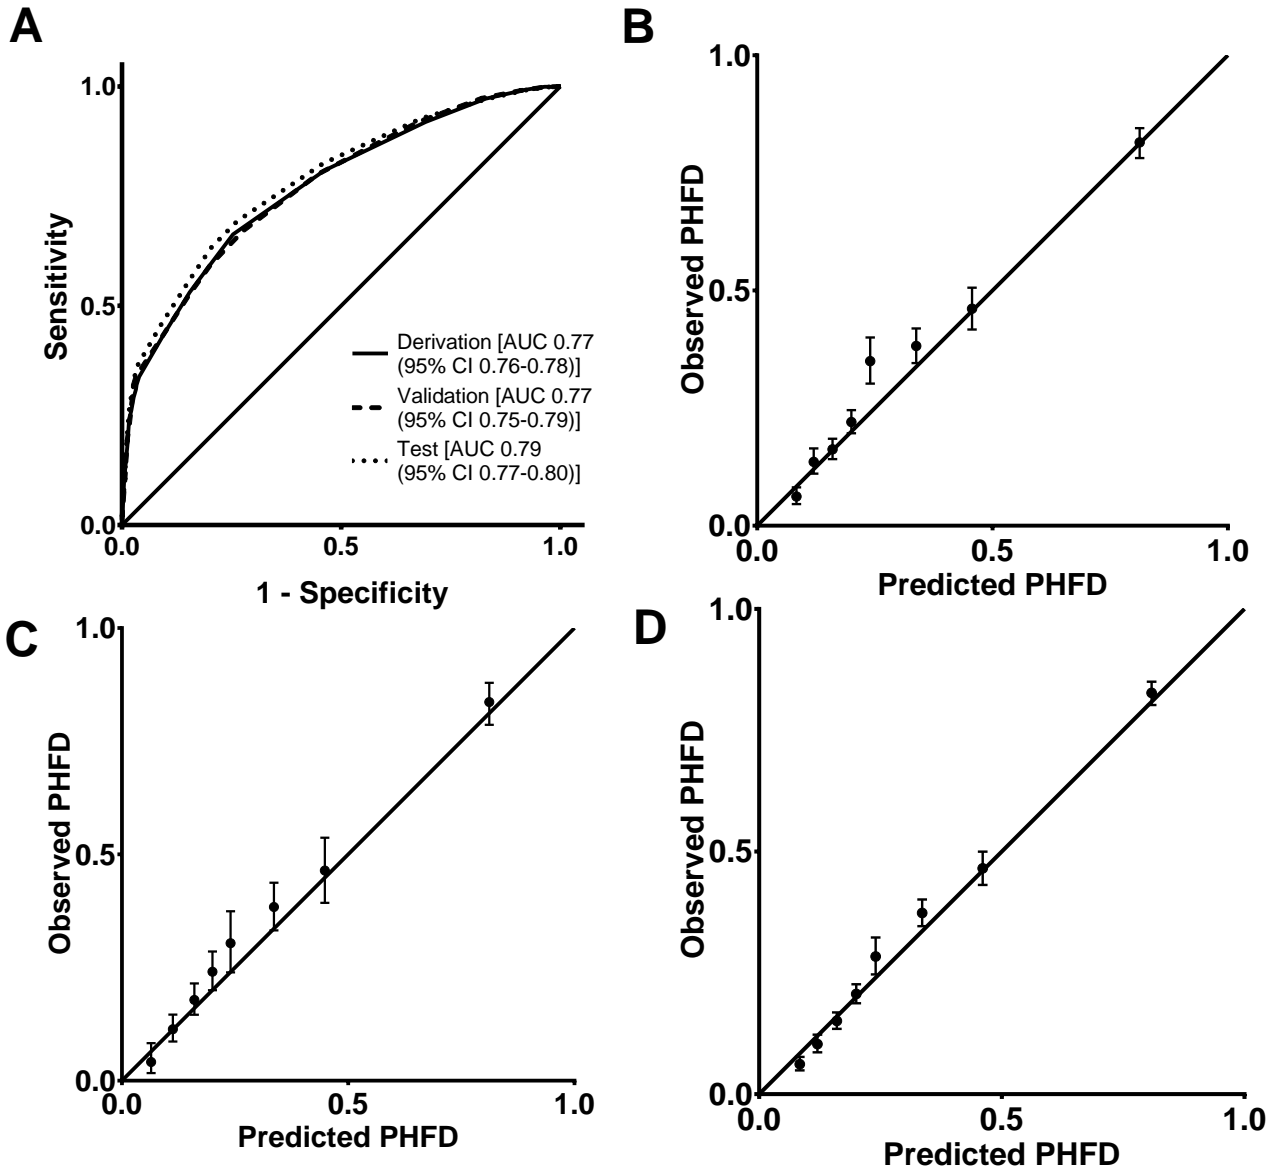

**Supplemental Figure 2.** Receiver operator characteristic (ROC) curves of risk score model for post hip fracture delirium (PHFD) in derivation and validation cohorts (A). Calibration plots showing observed and predicted PHFD risk across the range of risk scores (0-20) for derivation (B), validation (C) and test cohorts (D).
